# Supplementary material for: Attenuation of beta radiation in granular matrices: implications for trapped-charge dating
Source: Copernicus journal article supplement (doi:10.5194/gchron-4-517-2022), 2022-08-15
Supplement: Supplementary file 1 [file gchron-4-517-2022-supplement.zip]

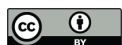

## *Supplement of*

# **Attenuation of beta radiation in granular matrices: implications for trapped-charge dating**

**Alastair C. Cunningham et al.**

*Correspondence to:* Jan-Pieter Buylaert ([jabu@dtu.dk](mailto:jabu@dtu.dk))

- [gchron-4-517-2022-supplement-title-page.pdf](#)
- [Supplement\\_2.0](#)
  - [BattenCalc\\_2.0.xlsx](#)

The copyright of individual parts of the supplement might differ from the article licence.
